# Supplementary material
Source: Springer Nature journal article supplement (https://www.springermedizin.de/resource/supplementary/13063_2010_542_MOESM2_ESM.pdf/9618866)
Supplement: MOESM2 [file 9618866]

# Traumatic Brain Injury Management

Admission to the ICU  
**Stage 1 therapy**

**ICP >20mmHg within 72 hours of injury - Check eligibility, obtain consent then RANDOMISE the patient**

## Control Group

Standard Care  
(Stage 1+2)

without therapeutic  
hypothermia

**Barbiturates not  
permitted**

## Treatment Group

**Standard Care  
(Stage 1+2)**

**HYPOTHERMIA 32-  
35°C for ≥ 48 hours**  
20-30 ml/kg infusion of  
refrigerated 0.9% saline  
then a cooling technique  
available at the centre

**Barbiturates not  
permitted**

## Stage 3 Options (if required)

Continued Medical Care  
Barbiturate Therapy with processed EEG  
monitoring  
Decompressive Craniectomy  
Further surgical intervention if required

## Day 28, hospital discharge or death

Modified Oxford Handicap Scale  
Length of Stay in ICU and Hospital

## 6 month Follow-up

Extended Glasgow Outcome  
Scale questionnaire
